# Supplementary material for: Digital technology and environmental risk communication: a structural analysis of Chinese netizens' participatory behaviour in Japanese nuclear sewage incident
Source: Research Square preprint supplement (doi:10.21203/rs.3.rs-7148982/v1), 2025-11-13
Supplement: Supplementary file 1 [file c64ec7ff462eb66cf56c6325.docx]

# Supplementary information

## 1 Python code

**from** selenium **import** webdriver

**from** selenium.webdriver.edge.service **import** Service

**from** selenium.webdriver.common.by **import** By

**from** selenium.webdriver.support.ui **import** WebDriverWait

**from** selenium.webdriver.support **import** expected_conditions as EC

**from** selenium.common.exceptions **import** NoSuchElementException, TimeoutException

**import** pandas as pd

**import** time

**import** random

**from** tqdm **import** tqdm

**from** datetime **import** datetime, timedelta

**import** os

EDGE_DRIVER_PATH **=** r'D:\zaba\msedgedriver.exe'

**class** WeiboSearchCrawler:

**def** __init__(self):

        self.driver **=** self.init_browser()

        self.login_weibo()

**def** init_browser(self):

        options **=** webdriver.EdgeOptions()

        options.add_argument("--disable-blink-features=AutomationControlled")

        options.add_experimental_option("excludeSwitches", ["enable-automation"])

        options.add_argument("--start-maximized")

        service **=** Service(executable_path**=**EDGE_DRIVER_PATH)

        driver **=** webdriver.Edge(service**=**service, options**=**options)

        driver.execute_cdp_cmd(

            "Page.addScriptToEvaluateOnNewDocument",

            {"source": "Object.defineProperty(navigator, 'webdriver', {get: () => undefined})"}

        )

**return** driver

**def** login_weibo(self):

        self.driver.get("https://weibo.com/login.php")

        print("请手动完成登录后按回车继续...")

        input()

**def** get_weibo_data(self, start_time, end_time):

        search_keyword **=** "核废水"

        url **=** f"https://s.weibo.com/weibo?q={search_keyword}&timescope=custom:{start_time}:{end_time}&Refer=weibo_time"

 self.driver.get(url)

        time.sleep(1)

**try**:

 no_result_msg **=** WebDriverWait(self.driver, 1).until(

                EC.presence_of_element_located((By.CSS_SELECTOR, 'div.card.card-no-result p'))

            )

**if** "抱歉，未找到相关结果。" **in** no_result_msg.text:

                print(f"在 {start_time} - {end_time} 时间段内未找到相关结果，跳过数据采集。")

**return** []

**except** TimeoutException:

**pass**

        all_weibos **=** []

        page_num **=** 1

        MAX_PAGE **=** 50

**while** True:

**try**:

                last_height **=** self.driver.execute_script("return document.body.scrollHeight")

**while** True:

                    self.driver.execute_script("window.scrollTo(0, document.body.scrollHeight);")

                    time.sleep(random.uniform(0.2, 0.3))

                    new_height **=** self.driver.execute_script("return document.body.scrollHeight")

**if** new_height **==** last_height:

**break**

                    last_height **=** new_height

                WebDriverWait(self.driver, 1).until(

                    EC.presence_of_element_located((By.CSS_SELECTOR, 'div.card-wrap'))

                )

                weibo_elements **=** self.driver.find_elements(By.CSS_SELECTOR, 'div.card-wrap')

**for** weibo **in** weibo_elements:

**try**:

                         weibo_id **=** weibo.get_attribute('mid')

                          publish_time **=** weibo.find_element(By.CSS_SELECTOR, 'div.from a:nth-child(1)').text

**try**:

                            link_element **=** weibo.find_element(By.CSS_SELECTOR, 'div.from a:nth-child(1)')

                            link **=** link_element.get_attribute('href')

**except** NoSuchElementException:

                            link **=** ""

                        username **=** weibo.find_element(By.CSS_SELECTOR, 'div.info a.name').text

                        user_link **=** weibo.find_element(By.CSS_SELECTOR, 'div.info a.name').get_attribute('href')

                        user_id **=** user_link.split('/')[**-**1].split('?')[0]

                        weibo_comment **=** weibo.find_element(By.CSS_SELECTOR, 'p.txt').text

**try**:

             like_count_elems **=** weibo.find_elements(By.CSS_SELECTOR, 'a[action-type="feed_list_like"] button span.woo-like-count')

**if** like_count_elems:

                                like_text **=** like_count_elems[**-**1].text.strip()

**if** like_text.isdigit():

                                    like_count **=** int(like_text)

**else**:

                                    like_count **=** 0

**else**:

                                like_count **=** 0

**except** NoSuchElementException:

                            like_count **=** 0

**try**:

                            comment_count_elem **=** weibo.find_element(By.CSS_SELECTOR, 'a[action-type="feed_list_comment"]')

                            comment_text **=** comment_count_elem.text.strip()

                            comment_text **=** comment_text.replace("'", "").replace('"', "")

                            if comment_text.isdigit():

                                comment_count = int(comment_text)

                            else:

                                comment_count = 0

                        except NoSuchElementException:

                            comment_count = 0

                        try:

                            forward_count_elem = weibo.find_element(By.CSS_SELECTOR, 'a[action-type="feed_list_forward"]')

                            forward_text = forward_count_elem.text.strip()

                            forward_text = forward_text.replace("'", "").replace('"', "")

**if** forward_text.isdigit():

                                forward_count **=** int(forward_text)

**else**:

                                forward_count **=** 0

**except** NoSuchElementException:

                            forward_count **=** 0

                        all_weibos.append({

                            'weibo_id': weibo_id,

                            'publish_time': publish_time,

                            'link': link,

                            'weibo_comment': weibo_comment,

                            'username': username,

                            'user_id': user_id,

                            'like_count': like_count,

                            'comment_count': comment_count,

                            'forward_count': forward_count

     })

**except** NoSuchElementException:

                        Continue

**if** page_num < MAX_PAGE:

**try**:

                        next_page **=** WebDriverWait(self.driver, 2).until(

                            EC.element_to_be_clickable((By.CSS_SELECTOR, 'a.next'))

                        )

                        next_page.click()

                        page_num **+=** 1

                        time.sleep(random.uniform(0.5, 1))

**except** (NoSuchElementException, TimeoutException):

**break**

**else**:

**break**              **except** Exception as e:

                print(f"爬取第 {page_num} 页失败: {str(e)}")

**break**

**return** all_weibos

**def** crawl_by_hour(self, start_date, end_date):

        all_data **=** []

        current_time **=** datetime.strptime(start_date, '%Y-%m-%d %H:%M:%S')

        end_datetime **=** datetime.strptime(end_date, '%Y-%m-%d %H:%M:%S')

        total_hours **=** int((end_datetime **-** current_time).total_seconds() **//** 3600)

        pbar **=** tqdm(total**=**total_hours, desc**=**"爬取进度")

        file_path **=** r'D:\zaba\weibo_nuclear_wastewater_total.csv'

**while** current_time < end_datetime:

            next_time **=** current_time **+** timedelta(hours**=**1)

            start_str **=** current_time.strftime('%Y-%m-%d-%H')

            end_str **=** next_time.strftime('%Y-%m-%d-%H')

            print(f"正在爬取 {start_str} - {end_str} 的数据...")

            weibo_data **=** self.get_weibo_data(start_str, end_str)

            all_data.extend(weibo_data)

            print(f"{start_str} - {end_str} 共爬取到 {len(weibo_data)} 条数据。")

            current_time **=** next_time

            time.sleep(random.uniform(0.5, 1))

            pbar.update(1)

**if** weibo_data:

                df **=** pd.DataFrame(weibo_data)

**if** os.path.exists(file_path):

                    df.to_csv(file_path, mode**=**'a', index**=**False, encoding**=**'utf-8-sig', header**=**False)

**else**:

                    df.to_csv(file_path, mode**=**'w', index**=**False, encoding**=**'utf-8-sig')

                print(f"已保存 {start_str} - {end_str} 的数据。")

        pbar.close()

**return** all_data

**def** close(self):

        self.driver.quit()

**if** __name__ **==** "__main__":

    start_date **=** "2024-08-27 11:00:00"

    end_date **=** "2025-02-01 00:00:00"#设置开始和结束日期

    crawler **=** WeiboSearchCrawler()

**try**:

        all_weibo_data **=** crawler.crawl_by_hour(start_date, end_date)

        print("数据已全部保存")

**except** Exception as e:

        print(f"发生错误: {str(e)}")

**finally**:

        crawler.close()

**import** pandas as pd

csv_file1 **=** r'D:\zaba\weibo_nuclear_wastewater_total.csv'

df1 **=** pd.read_csv(csv_file1)

csv_file2 **=** r'D:\zaba\weibo_nuclear_wastewater.csv'

df2 **=** pd.read_csv(csv_file2)

merged_df **=** pd.concat([df1, df2], ignore_index**=**True)

merged_df.to_csv(r'D:\zaba\weibo_nuclear_wastewater_merged_file.csv', index**=**False)

print("合并完成，结果已保存到 merged_file.csv")

**import** pandas as pd

file_path **=** r'D:\zaba\weibo_nuclear_wastewater_merged_file.csv'

**try**:

    df **=** pd.read_csv(file_path)

    print('数据基本信息：')

    df.info()

    rows, columns **=** df.shape

**if** rows < 20:

        print('数据全部内容信息：')

        print(df.to_csv(sep**=**'\t', na_rep**=**'nan'))

**else**:

   print('数据前几行内容信息：')

        print(df.head().to_csv(sep**=**'\t', na_rep**=**'nan'))

**except** FileNotFoundError:

    print(f"文件 {file_path} 未找到，请检查文件路径是否正确。")

**except** Exception as e:

print(f"读取文件时出现错误：{e}")

duplicate_count **=** df.duplicated().sum()

print(f"\n发现 {duplicate_count} 条重复记录")

**if** duplicate_count > 0:

    print(f"\n已删除 {duplicate_count} 条重复记录")

df **=** df.drop_duplicates()

**else**:

    print("\n未发现重复记录。")

file_path **=** r'D:\zaba\weibo_nuclear_wastewater_output_去重.csv'

df.to_csv(file_path, index**=**False, encoding**=**'utf-8-sig')

print(f"\n处理后的数据已保存到 {file_path}")

file_path **=** r'D:\zaba\weibo_nuclear_wastewater_output_去重.csv'

**try**:

    df **=** pd.read_csv(file_path)

    print('数据基本信息：')

    df.info()

 rows, columns **=** df.shape

**if** rows < 20:

        print('数据全部内容信息：')

        print(df.to_csv(sep**=**'\t', na_rep**=**'nan'))

**else**:

        print('数据前几行内容信息：')

        print(df.head().to_csv(sep**=**'\t', na_rep**=**'nan'))

**except** FileNotFoundError:

    print(f"文件 {file_path} 未找到，请检查文件路径是否正确。")

**except** Exception as e:

    print(f"读取文件时出现错误：{e}")

condition **=** (

    ~df['publish_time'].str.contains('今天', na**=**False) &

    ~df['publish_time'].str.contains('分钟前', na**=**False) &

    ~df['publish_time'].str.contains('秒前', na**=**False) &

    ~df['publish_time'].str.startswith('03', na**=**False)

)

df **=** df[condition]

file_path **=** r'D:\zaba\weibo_nuclear_wastewater_data_去无关.csv'

df.to_csv(file_path, index**=**False, encoding**=**'utf-8-sig')

print(f"处理后的数据已保存到 {file_path}")

print("\n数据清洗完成后的基本信息：")

df.info()

**import** matplotlib.pyplot as plt

**import** seaborn as sns

value_counts_attitudes **=** df['like_count'].value_counts()

print("不同值对应的数据量：")

print(value_counts_attitudes)

plt.rcParams['figure.dpi'] **=** 300

plt.rcParams['font.sans-serif'] **=** ['SimHei']

plt.rcParams['axes.unicode_minus'] **=** False

bins **=** [**-**1, 10, 100, 1000, 10000, float('inf')]

labels **=** ['0 - 9', '10 - 99', '100 - 999', '1000 - 9999', '10000+']

grouped **=** pd.cut(value_counts_attitudes.index, bins**=**bins, labels**=**labels)

grouped_counts **=** value_counts_attitudes.groupby(grouped).sum()

colors **=** ['#376795', '#72BCD5', '#FFD06F', '#F7AA58', '#E76254']

plt.figure(figsize**=**(8, 4))

bars **=** plt.bar(grouped_counts.index, grouped_counts.values, color**=**colors)

plt.xlabel('点赞量区间', fontsize**=**6)

plt.ylabel('内容量', fontsize**=**6)

plt.title('不同点赞量区间的内容量', fontsize**=**8)

plt.tick_params(axis**=**'both', which**=**'major', labelsize**=**6)

plt.grid(False)

**for** bar **in** bars:

    height **=** bar.get_height()

    plt.annotate(f'{height}', xy**=**(bar.get_x() **+** bar.get_width() **/** 2, height),

                 xytext**=**(0, 3), textcoords**=**'offset points', ha**=**'center', va**=**'bottom',fontsize**=**6)

plt.show()

value_counts_comments **=** df['comment_count'].value_counts()

print("不同值对应的数据量：")

print(value_counts_comments)

plt.rcParams['figure.dpi'] **=** 300

plt.rcParams['font.sans-serif'] **=** ['SimHei']

plt.rcParams['axes.unicode_minus'] **=** False

bins **=** [**-**1, 10, 100, 1000, 10000, float('inf')]

labels **=** ['0 - 9', '10 - 99', '100 - 999', '1000 - 9999', '10000+']

grouped **=** pd.cut(value_counts_comments.index, bins**=**bins, labels**=**labels)

grouped_counts **=** value_counts_comments.groupby(grouped).sum()

colors **=** ['#376795', '#72BCD5', '#FFD06F', '#F7AA58', '#E76254']

plt.figure(figsize**=**(8, 4))

bars **=** plt.bar(grouped_counts.index, grouped_counts.values, color**=**colors)

plt.xlabel('评论量区间', fontsize**=**6)

plt.ylabel('内容量', fontsize**=**6)

plt.title('不同评论量区间的内容量', fontsize**=**8)

plt.tick_params(axis**=**'both', which**=**'major', labelsize**=**6)

plt.grid(False)

**for** bar **in** bars:

    height **=** bar.get_height()

    plt.annotate(f'{height}', xy**=**(bar.get_x() **+** bar.get_width() **/** 2, height),

                 xytext**=**(0, 3), textcoords**=**'offset points', ha**=**'center', va**=**'bottom',fontsize**=**6)

plt.show()

value_counts_reposts **=** df['forward_count'].value_counts()

print("不同值对应的数据量：")

print(value_counts_reposts)

plt.rcParams['figure.dpi'] **=** 300

plt.rcParams['font.sans-serif'] **=** ['SimHei'

plt.rcParams['axes.unicode_minus'] **=** False

bins **=** [**-**1, 10, 100, 1000, 10000, float('inf')]

labels **=** ['0 - 9', '10 - 99', '100 - 999', '1000 - 9999', '10000+']

grouped **=** pd.cut(value_counts_reposts.index, bins**=**bins, labels**=**labels)

grouped_counts **=** value_counts_reposts.groupby(grouped).sum()

colors **=** ['#376795', '#72BCD5', '#FFD06F', '#F7AA58', '#E76254']

plt.figure(figsize**=**(8, 4))

bars **=** plt.bar(grouped_counts.index, grouped_counts.values, color**=**colors)

plt.xlabel('转发量区间', fontsize**=**6)

plt.ylabel('内容量', fontsize**=**6)

plt.title('不同转发量区间的内容量', fontsize**=**8)

plt.tick_params(axis**=**'both', which**=**'major', labelsize**=**6)

plt.grid(False)

**for** bar **in** bars:

    height **=** bar.get_height()

    plt.annotate(f'{height}', xy**=**(bar.get_x() **+** bar.get_width() **/** 2, height),

                 xytext**=**(0, 3), textcoords**=**'offset points', ha**=**'center', va**=**'bottom',fontsize**=**6)

plt.show()

**import** pandas as pd

**import** jieba

**from** wordcloud **import** WordCloud

**import** matplotlib.pyplot as plt

**from** matplotlib.colors **import** LinearSegmentedColormap

colors **=** [

    (231**/**255, 98**/**255, 84**/**255),

    (239**/**255, 138**/**255, 71**/**255),

    (247**/**255, 170**/**255, 88**/**255),

    (255**/**255, 208**/**255, 111**/**255),

    (255**/**255, 230**/**255, 183**/**255),

    (170**/**255, 220**/**255, 224**/**255),

    (114**/**255, 188**/**255, 213**/**255),

    (82**/**255, 143**/**255, 173**/**255),

    (55**/**255, 103**/**255, 149**/**255),

    (30**/**255, 70**/**255, 110**/**255)

]

cmap **=** LinearSegmentedColormap.from_list('custom_cmap', colors)

**def** generate_wordcloud(df, content):

    all_text **=** " ".join(df[content].astype(str).tolist())

    words **=** jieba.lcut(all_text)

    words **=** [word **for** word **in** words **if** word.strip() **and** word !**=** '展开']

    text_for_wordcloud **=** " ".join(words)

    wordcloud **=** WordCloud(

 background_color**=**"white",

        width**=**800,

        height**=**400,

        font_path**=**'simhei.ttf',

        colormap**=**cmap

 ).generate(text_for_wordcloud)

    plt.figure(figsize**=**(10, 5))

    plt.imshow(wordcloud, interpolation**=**'bilinear')

plt.axis("off")

    plt.show()

generate_wordcloud(df, 'weibo_comment')

**import** pandas as pd

df['influence'] **=** df['forward_count'] ***** 1 **+** (df['comment_count'] **+** df['like_count']) ***** 0.5

grouped **=** df.groupby('user_id')['influence'].sum().reset_index()

opinion_leaders_df **=** grouped[grouped['influence'] >**=** 20000]

merged_df **=** pd.merge(opinion_leaders_df, df[['user_id', 'username']], on**=**'user_id', how**=**'left')

merged_df **=** merged_df.drop_duplicates(subset**=**'user_id')

sorted_df **=** merged_df.sort_values(by**=**'influence', ascending**=**False)

result_df **=** sorted_df[['user_id', 'username', 'influence']]

num_opinion_leaders **=** len(result_df)

print(f"共筛选出 {num_opinion_leaders} 个具有较高影响力的用户。")

print("微博意见领袖初步数据库（按影响力从高到低排序）：")

print(result_df)

user_id_list **=** result_df['user_id'].tolist()

print("具有较高影响力用户的 user_id 列表：")

print(user_id_list)

**from** selenium **import** webdriver

**from** selenium.webdriver.edge.service **import** Service

**from** selenium.webdriver.common.by **import** By

**from** selenium.webdriver.support.ui **import** WebDriverWait

**from** selenium.webdriver.support **import** expected_conditions as EC

**from** selenium.common.exceptions **import** NoSuchElementException

**import** pandas as pd

**import** time

**import** random

**from** tqdm **import** tqdm

**from** scipy.sparse **import** lil_matrix

EDGE_DRIVER_PATH **=** r'D:\zaba\msedgedriver.exe'

**class** WeiboBrowserCrawler:

**def** __init__(self):

        self.driver **=** self.init_browser()

        self.login_weibo()

**def** init_browser(self):

        options **=** webdriver.EdgeOptions()

        options.add_argument("--disable-blink-features=AutomationControlled")

        options.add_experimental_option("excludeSwitches", ["enable-automation"])

        options.add_argument("--start-maximized")

        service **=** Service(executable_path**=**EDGE_DRIVER_PATH)

     driver **=** webdriver.Edge(service**=**service, options**=**options)

        driver.execute_cdp_cmd(

            "Page.addScriptToEvaluateOnNewDocument",

            {"source": "Object.defineProperty(navigator, 'webdriver', {get: () => undefined})"}

        )

**return** driver

**def** login_weibo(self):

        self.driver.get("https://weibo.com/login.php")

        print("请手动完成登录后按回车继续...")

        input()

**def** follow_user(self, uid):

**try**:

            self.driver.get(f"https://weibo.com/u/{uid}")

            time.sleep(3)

            follow_button **=** self.driver.find_element(By.XPATH, '//*[@id="app"]/div[2]/div[2]/div[2]/main/div/div/div[2]/div[2]/div[3]/span/button')

            follow_button.click()

            print(f"已关注用户 {uid}")

            time.sleep(2)

**except** NoSuchElementException:

            print(f"未找到关注按钮，可能已关注用户 {uid}")

**except** Exception as e:

            print(f"关注用户 {uid} 失败: {str(e)}")

**def** get_follow_list(self, uid):

        self.driver.get(f"https://weibo.com/u/page/follow/{uid}")

        time.sleep(3)

**try**:

            restricted_msg **=** self.driver.find_element(By.XPATH, '//span[contains(text(), "博主设置仅针对粉丝展示全部关注")]')

            print("检测到关注受限，尝试关注该用户...")

            self.follow_user(uid)

            self.driver.get(f"https://weibo.com/u/page/follow/{uid}"

            time.sleep(3)

**except** NoSuchElementException:

**pass**

        last_height **=** 0

        retry_count **=** 0

        max_retry **=** 3

**while** True:

            self.driver.execute_script(

                "window.scrollTo(0, document.body.scrollHeight);"

            )

            time.sleep(random.uniform(1.5, 2.5))

            new_height **=** self.driver.execute_script("return document.body.scrollHeight")

**if** new_height **==** last_height:

                retry_count **+=** 1

**if** retry_count >**=** max_retry:

**break**

**else**:

                retry_count **=** 0

                last_height **=** new_height

**try**:

                end_marker **=** self.driver.find_element(

                    By.XPATH,

                    '//div[contains(text(), "已经没有更多")]'

                )

**if** end_marker:

**break**

**except** NoSuchElementException:

**continue**

        follow_elements **=** self.driver.find_elements(

            By.XPATH,

            '//a[contains(@href, "/u/")]'

        )

        follow_list **=** []

**for** element **in** follow_elements:

            href **=** element.get_attribute("href")

**if** "/u/" **in** href:

                uid **=** href.split("/u/")[**-**1]

**if** uid.isdigit():

                    follow_list.append(str(uid))  # 确保为字符串类型

                    print(f"获取到关注列表: {uid}")

        print(follow_list)

**return** list(follow_list)

**def** build_relation_matrix(self, users):

        matrix **=** pd.DataFrame(0, index**=**users, columns**=**users)

**for** source_user **in** tqdm(users, desc**=**"构建关系矩阵"):

**try**:

                follow_list **=** self.get_follow_list(source_user)

                print(f"当前用户 {source_user} 的关注列表: {follow_list}")

                print(f"用户列表: {users}")

**for** target_user **in** users:

**for** i **in** follow_list:

**if** target_user **==** i:

print(f"target_user:{target_user};source_user:{source_user};设置为1.")

                            matrix.at[source_user, target_user] **=** 1

                time.sleep(random.uniform(2, 5))

**except** Exception as e:

             print(f"处理用户 {source_user} 失败: {str(e)}")

**return** matrix

**def** close(self):

        self.driver.quit()

**if** __name__ **==** "__main__":

    user_id_list **=** [str(user_id) **for** user_id **in** user_id_list]

    crawler **=** WeiboBrowserCrawler()

**try**:

        relation_matrix **=** crawler.build_relation_matrix(user_id_list)

        relation_matrix.to_csv(r'D:\zaba\weibo_matrix_总.csv')

        print("数据已保存")

**finally**:

        crawler.close()

**import** pandas as pd

file_path **=** r'D:\zaba\weibo_nuclear_wastewater_data_清洗点赞.xlsx'  # 替换为你的 Excel 文件路径

df **=** pd.read_excel(file_path)

columns_to_extract **=** ['user_id', 'username']

extracted_df **=** df[columns_to_extract]

unique_df **=** extracted_df.drop_duplicates()

new_file_path **=** r'D:\zaba\new_map_file.xlsx'  # 新文件的保存路径

unique_df.to_excel(new_file_path, index**=**False)

print(f"已将去重后的数据保存到 {new_file_path} 文件中。")

**import** pandas as pd

target_list **=** [2803301701, 2656274875, 1784473157, 2028810631, 3266943013, 1887344341, 1656831930, 1618051664, 6889497606, 1497714867, 1193257803, 2375086267, 5336533996, 2001278057, 5608027665, 5611783716, 1974576991, 7010131150, 1643971635, 2537882762, 2868676035, 2258727970, 2318910945, 1198220993, 2140522467, 1582297713, 1893892941, 3937348351, 2615417307,

1633537680, 3939426052, 1806128454, 1646051850, 6508016609, 5486573590, 1672519561, 1649173367, 1895170013, 5993531560, 3163693955, 6004281123, 2574488684, 2127460165, 1938487875, 5230132970, 1977460817, 5044281310, 1564834725, 2214838982, 1659893422, 1663072851, 6928838279, 7110204873, 1700648435, 1371701597, 3603642810, 1638782947, 5307012945, 6362632222, 1683472727, 1930723113, 7782884695, 6105713761, 2580225544, 2079751412, 5564927603, 2243906402, 1884763073, 5721376081, 1699432410, 5948233682, 1347322121, 1845864154, 3031762330, 6156735356, 1314608344, 5864631680, 3064209773, 3604378011, 1453372141, 5532241609, 1977581633, 1553177803, 7767790303, 5295310870, 7040797671, 1165975013, 6189120710, 5145725878, 5631464467, 3775056661, 2337348632, 1496814565, 2343014623, 2070213285, 6317134281, 1323527941, 1168968415, 3057540037, 1717833412, 1820201245, 5594165638, 5765378903, 6092428387, 6779889094, 3515639462, 2150758415, 6244553417, 6545577536, 1226134960, 5517771876, 5543176559, 1229253383, 1971538745, 5333693607, 7542580540, 2489313225, 3203137375, 2624755655, 1916468595, 6371487213, 6016020391, 5383101754, 2378928115, 6636035720, 6312287508, 3183588832, 7558234208, 3871112345, 1632155184, 2730549204, 7283364547, 5974488036,2104693617, 1895859130, 5594732112, 5847762627, 1489482040, 2001530981, 2840321860, 2397417584, 1852299857, 7484864135, 1677318422, 1959830294, 5601629229]

file_path **=** r'D:\zaba\new_map_file.xlsx'

df **=** pd.read_excel(file_path)

column_name **=** 'user_id'

filtered_df **=** df[df[column_name].isin(target_list)]

output_file **=** r'D:\zaba\filtered_file.xlsx'

filtered_df.to_excel(output_file, index**=**False)

print(f"筛选后的数据已保存到 {output_file}")

**import** pandas as pd

df_map **=** pd.read_excel(r'D:\zaba\filtered_file.xlsx')

mapping_dict **=** df_map.set_index("user_id")["username"].to_dict()

df **=** pd.read_csv(r'D:\zaba\weibo_matrix_总.csv', header**=**None)

df_1 **=** df.replace(mapping_dict)

df_1.to_csv(r'D:\zaba\matrix_selenium_总.csv', index**=**False)

**import** pandas as pd

**import** networkx as nx

**import** matplotlib.pyplot as plt

**import** numpy as np

**from** pyvis.network **import** Network

**import** community.community_louvain as cl

**import** os

**import** pkg_resources

**import** chardet

plt.rcParams['font.sans-serif'] **=** ['SimHei']

plt.rcParams['axes.unicode_minus'] **=** False

**class** WeiboNetworkAnalyzer:

**def** __init__(self, matrix_path):

        """

        初始化网络分析器

        :param matrix_path: 邻接矩阵Excel文件路径

        """

        self.matrix **=** pd.read_excel(matrix_path, index_col**=**0)

        self.G **=** self.build_graph()

        self.G.remove_edges_from(nx.selfloop_edges(self.G))

        self.network_properties **=** self.calculate_network_properties()

**def** build_graph(self):

        """构建有向图网络"""

        G **=** nx.DiGraph()

        G.add_nodes_from(self.matrix.index)

**for** source **in** self.matrix.index:

**for** target **in** self.matrix.columns:

**if** self.matrix.loc[source, target] **==** 1:

                    G.add_edge(source, target)

**return** G

**def** calculate_network_properties(self):

        """计算整体网络结构指标"""

        props **=** {

            '节点数': self.G.number_of_nodes(),

            '边数': self.G.number_of_edges(),

            '网络密度': nx.density(self.G),

            '平均聚类系数': nx.average_clustering(self.G),

            '是否弱连通': nx.is_weakly_connected(self.G),

            '弱连通组件数': nx.number_weakly_connected_components(self.G),

            '强连通组件数': nx.number_strongly_connected_components(self.G),

        }

**try**:

            props['平均路径长度'] **=** nx.average_shortest_path_length(self.G)

**except** nx.NetworkXError:

            props['平均路径长度'] **=** '非连通图'

**return** pd.Series(props)

**def** calculate_centrality(self):

        """计算各类中心性指标"""

**return** pd.DataFrame({

            '点入度': dict(self.G.in_degree()),

            '点出度': dict(self.G.out_degree()),

            '点度中心度': nx.degree_centrality(self.G),

            '中间中心度': nx.betweenness_centrality(self.G, normalized**=**True),

            '接近中心度': nx.closeness_centrality(self.G),

            'PageRank': nx.pagerank(self.G)

        })

**def** core_periphery_analysis(self):

        """核心-边缘结构分析"""

        core_number **=** nx.core_number(self.G)

**return** pd.Series(core_number).sort_values(ascending**=**False)

**def** structural_holes_analysis(self):

        """结构洞分析"""

**return** pd.Series(nx.constraint(self.G)).sort_values()

**def** detect_communities(self):

        """使用Louvain算法进行社区检测"""

**try**:

            G_undir **=** self.G.to_undirected()

            partition **=** cl.best_partition(G_undir)

            communities **=** {}

**for** node, comm_id **in** partition.items():

                communities.setdefault(comm_id, []).append(node)

            comm_list **=** []

            modularity **=** cl.modularity(partition, G_undir)

**for** comm_id, members **in** communities.items():

                comm_list.append({

                    '社区ID': comm_id,

                    '成员数': len(members),

                    '成员列表': ', '.join(members),

                    '模块度': modularity

                })

**return** pd.DataFrame(comm_list).sort_values('成员数', ascending**=**False)

**except** Exception as e:

            print(f"社区检测失败: {str(e)}")

**return** pd.DataFrame()

**def** analyze_cliques(self, min_size**=**3):

        """派系分析（完全连接子图）"""

**try**:

            G_undir **=** self.G.to_undirected()

            cliques **=** list(nx.find_cliques(G_undir))

               clique_data **=** []

**for** idx, clique **in** enumerate(filter(**lambda** x: len(x)>**=**min_size, cliques)):

                clique_data.append({

                    '派系ID': idx**+**1,

                    '成员数': len(clique),

                    '成员列表': ', '.join(clique)

                })

**return** pd.DataFrame(clique_data)

**except** Exception as e:

            print(f"派系分析失败: {str(e)}")

**return** pd.DataFrame()

**def** calculate_degree_statistics(self):

        """度分布统计分析"""

        in_degrees **=** [d **for** _, d **in** self.G.in_degree()]

        out_degrees **=** [d **for** _, d **in** self.G.out_degree()]

**return** pd.Series({

            '入度平均值': np.mean(in_degrees),

            '入度标准差': np.std(in_degrees),

            '入度最大值': max(in_degrees),

            '出度平均值': np.mean(out_degrees),

            '出度标准差': np.std(out_degrees),

            '出度最大值': max(out_degrees)

        })

**def** visualize_with_networkx(self, output_path, community_visualization**=**False):

  """增强版可视化（支持社区/核心度着色）"""

        plt.figure(figsize**=**(20, 15))

**try**:

            pos **=** nx.spring_layout(self.G, k**=**0.1, iterations**=**100, seed**=**42)

**if** community_visualization:

                df_comm **=** self.detect_communities()

                node_colors **=** {}

**for** _, row **in** df_comm.iterrows():

**for** node **in** row['成员列表'].split(', '):

                        node_colors[node] **=** row['社区ID']

                colors **=** [node_colors.get(node, **-**1) **for** node **in** self.G.nodes()]

                cmap **=** plt.cm.tab20

                legend_label **=** '社区ID'

**else**:

                core_number **=** nx.core_number(self.G)

                colors **=** list(core_number.values())

                cmap **=** plt.cm.viridis

                legend_label **=** '核心度'

            nodes **=** nx.draw_networkx_nodes(

                self.G, pos,

                node_size**=**[v*****8000 **for** v **in** nx.pagerank(self.G).values()],

                node_color**=**colors,

                cmap**=**cmap,

                alpha**=**0.8

            )

            nx.draw_networkx_edges(

                self.G, pos,

                width**=**0.8,

                alpha**=**0.3,

                edge_color**=**"grey"

            )

            sm **=** plt.cm.ScalarMappable(

                cmap**=**cmap,

                norm**=**plt.Normalize(vmin**=**min(colors), vmax**=**max(colors))

            )

            sm.set_array([])

            cbar **=** plt.colorbar(sm, label**=**legend_label)

            top_nodes **=** self.calculate_centrality().nlargest(5, '点度中心度').index

            labels **=** {n: n **for** n **in** top_nodes}

            nx.draw_networkx_labels(self.G, pos, labels, font_size**=**10, font_color**=**'red')

            plt.title('微博网络可视化分析', fontsize**=**20)

            plt.savefig(output_path, dpi**=**300, bbox_inches**=**'tight')

**except** Exception as e:

            print(f"可视化失败: {str(e)}")

**finally**:

            plt.close()

**def** generate_report(self, output_path):

        """生成增强版分析报告"""

**try**:

            with pd.ExcelWriter(output_path) as writer:

                self.calculate_centrality().to_excel(writer, sheet_name**=**'中心性分析')

                self.core_periphery_analysis().to_excel(writer, sheet_name**=**'核心-边缘分析')

                self.structural_holes_analysis().to_excel(writer, sheet_name**=**'结构洞分析')

                    self.network_properties.to_frame('指标值').to_excel(

                    writer, sheet_name**=**'网络结构指标'

                )

                self.detect_communities().to_excel(

                    writer, sheet_name**=**'社区检测', index**=**False

                )

                self.analyze_cliques().to_excel(

                    writer, sheet_name**=**'派系分析', index**=**False

                )

                self.calculate_degree_statistics().to_frame('统计值').to_excel(

                    writer, sheet_name**=**'度分布统计'

                )

            print(f"报告已生成: {output_path}")

**except** Exception as e:

            print(f"生成报告失败: {str(e)}")

**if** __name__ **==** "__main__":

    input_path **=** r'D:\zaba\matrix_selenium_总.xlsx'

    analyzer **=** WeiboNetworkAnalyzer(input_path)

    report_path **=** r'D:\zaba\舆情分析报告_增强版_总1.xlsx'

    analyzer.generate_report(report_path)

    analyzer.visualize_with_networkx(r'D:\zaba\核心度可视化_总1.png')

    analyzer.visualize_with_networkx(

        r'D:\zaba\社区可视化_总1.png',

        community_visualization**=**True

    )

    analyzer.interactive_visualization(r'D:\zaba\交互式网络_总1.html')

    print("\n=== 网络结构指标 ===")

    print(analyzer.network_properties.to_string())

    print("\n=== 核心节点Top5 ===")

    print(analyzer.core_periphery_analysis().head(5).to_string())

    print("\n=== 社区检测Top3 ===")

    print(analyzer.detect_communities().head(3).to_string(index**=**False))

    print("\n=== 度分布统计 ===")

print(analyzer.calculate_degree_statistics().to_string())
